# Supplementary material for: Wastewater treatment plants as a source of plastics in the environment: a review of occurrence, methods for identification, quantification and fate
Source: Royal Society of Chemistry journal article supplement (doi:10.1039/c9ew00428a), 2019-01-01
Supplement: c9ew00428a1.pdf [file c9ew00428a1.pdf]

**Wastewater treatment plants as a source of plastics in the environment: a review of  
occurrence, methods for identification, quantification and fate**

**Supplementary Information**

Elvis D. Okoffo<sup>1\*</sup>, Stacey O'Brien<sup>1</sup>, Jake W. O'Brien<sup>1</sup>, Benjamin J. Tscharke<sup>1</sup> and Kevin V.  
Thomas<sup>1</sup>

<sup>1</sup>Queensland Alliance for Environmental Health Sciences (QAEHS), The University of  
Queensland, 20 Cornwall Street, Woolloongabba, QLD, 4102, Australia.

\*Corresponding Author

E-mail address: [e.okoffo@uq.edu.au](mailto:e.okoffo@uq.edu.au)

Tel: +61 7 3343 2443

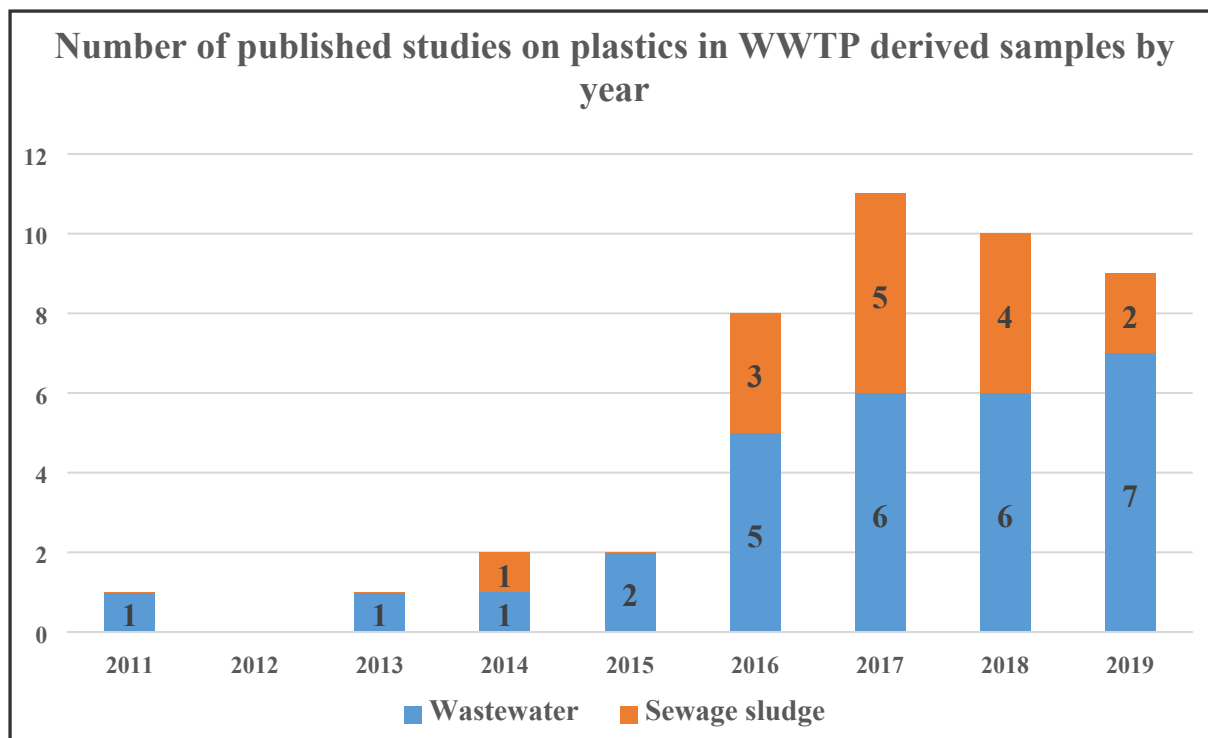

**Figure S1. Publications in the field of plastic particle analysis in WWTP derived samples per year. Generated using data from Table 1 and 2 in main manuscript.**
